# Supplementary material for: Peptide Nucleic Acid Clamp‐Assisted Photothermal Multiplexed Digital PCR for Identifying SARS‐CoV‐2 Variants of Concern
Source: PubMed Central journal article supplement (PMC10987151; doi:10.1002/advs.202306088), 2024-01-19
Supplement: ADVS-11-2306088-s001.pdf [file ADVS-11-2306088-s001.pdf]

## Supporting Information

for *Adv. Sci.*, DOI 10.1002/adv.202306088

Peptide Nucleic Acid Clamp-Assisted Photothermal Multiplexed Digital PCR for Identifying SARS-CoV-2 Variants of Concern

*Lexiang Zhang, Rokshana Parvin, Siyue Lin, Mingshuo Chen, Ruixuan Zheng, Qihui Fan\* and Fangfu Ye\**

## **Supplementary Information for**

### **Peptide Nucleic Acid Clamp-assisted Photothermal Multiplexed Digital PCR for Identifying SARS-CoV-2 Variants of Concern**

Lexiang Zhang, Rokshana Parvin, Siyue Lin, Mingshuo Chen, Ruixuan Zheng, Qihui  
Fan\*, Fangfu Ye\*

Corresponding author: Qihui Fan, Fangfu Ye

Email: fanqh@iphy.ac.cn; fye@iphy.ac.cn

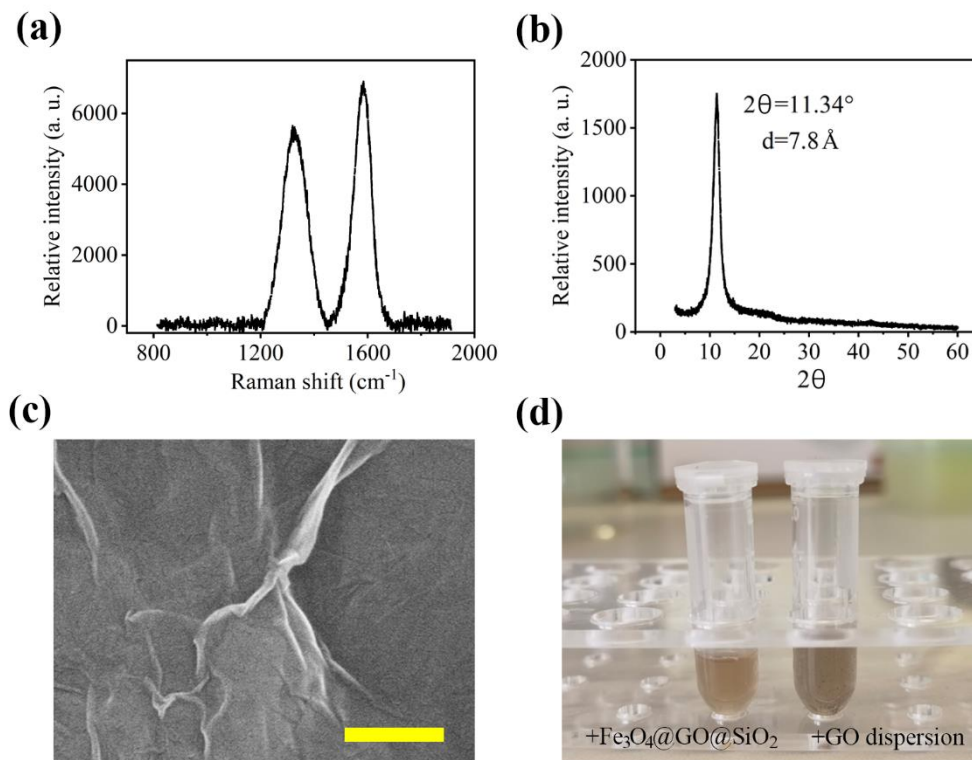

**Figure S1.** Morphology and physicochemical characteristic of GO nanosheets. (a) Raman spectra of graphene oxides showing characteristic peaks centered at  $\sim 1350$  and  $1585\text{ cm}^{-1}$  respectively. (b) XRD analysis. (c) SEM image. (d) Photograph of the dispersion of GO nanosheet and  $\text{Fe}_3\text{O}_4@\text{GO}@\text{SiO}_2$  in 10 % gelatin samples, respectively, after a few rounds of heating to  $95\text{ }^\circ\text{C}$ . Scale bar, 250nm in (c).

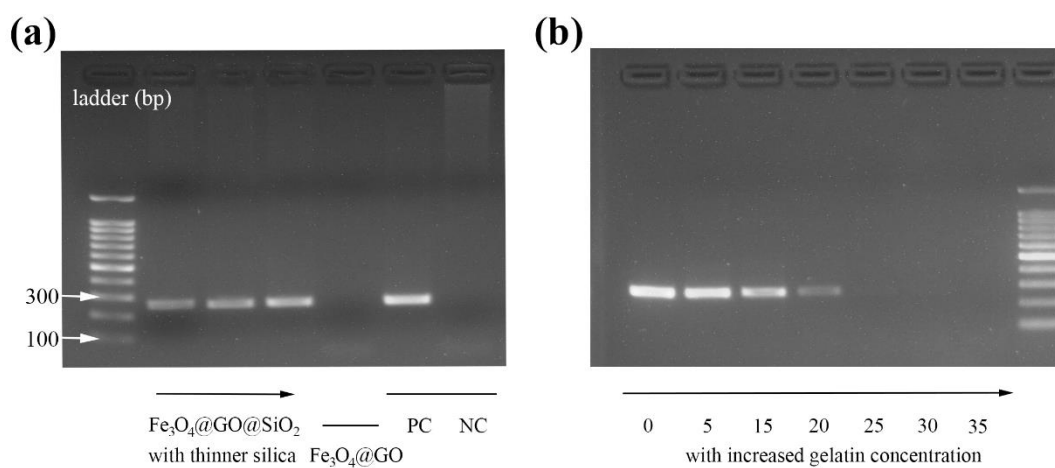

**Figure S2.** Electrophoresis gel images showing biocompatibility of nanocomposite-doped gelatin substrate for PCR. PC and NC columns represent positive and negative controls without nanomaterial addition. PCR efficiency as functions of (a) silica shell thickness and (b) gelatin concentration.

**Table S1.** Size distributions with the polydispersity indexes and standard deviations

|                                                     | diameter | polydispersity index | standard deviation |
|-----------------------------------------------------|----------|----------------------|--------------------|
| Fe <sub>3</sub> O <sub>4</sub> @GO                  | 335      | 0.213                | 146.6              |
| Fe <sub>3</sub> O <sub>4</sub> @GO@SiO <sub>2</sub> | 1313     | 0.335                | 365.3              |
| (with four different silica thickness)              | 1235     | 0.542                | 236.5              |
|                                                     | 940      | 0.322                | 312.7              |
|                                                     | 742      | 0.314                | 246.9              |

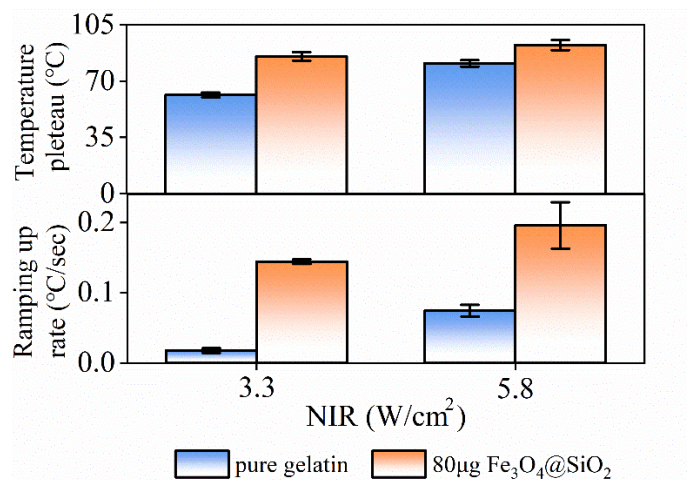

**Figure S3.** Temperature climbing evaluation of 50 µL gelatin samples with and without Fe<sub>3</sub>O<sub>4</sub>@SiO<sub>2</sub> NPs addition. Error bar, mean ± s.e.m. (n= 3).

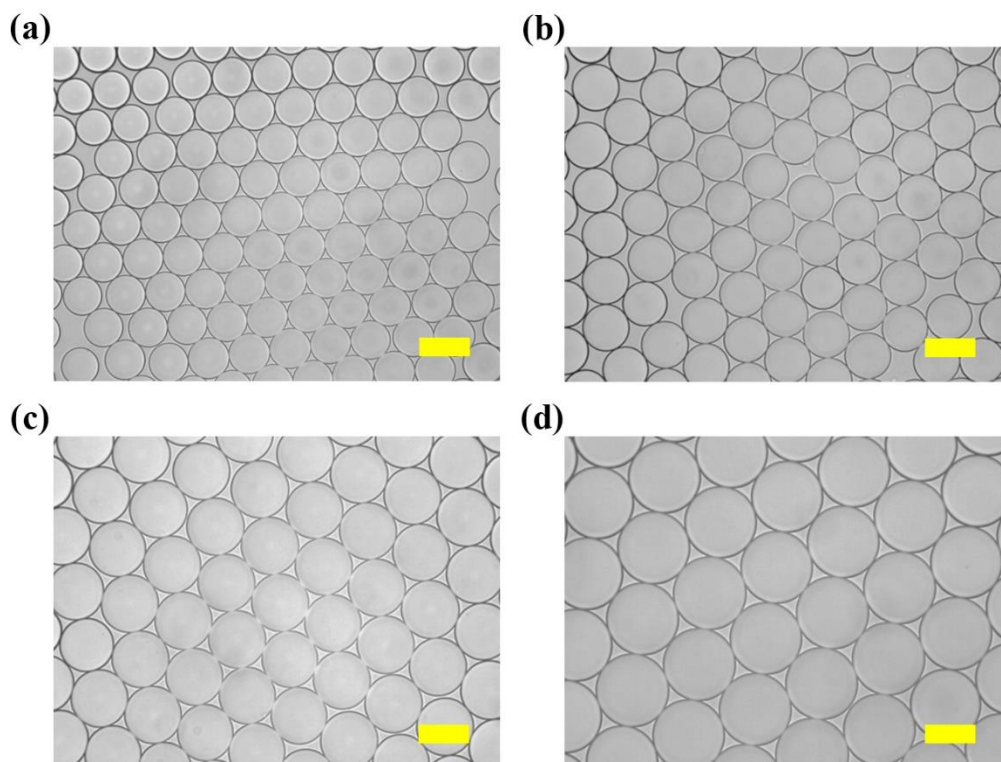

**Figure S4.** Uniformity of produced microcarriers with average diameter of 83, 95, 116, and 126 µm, respectively. Scale bar, 100 µm.

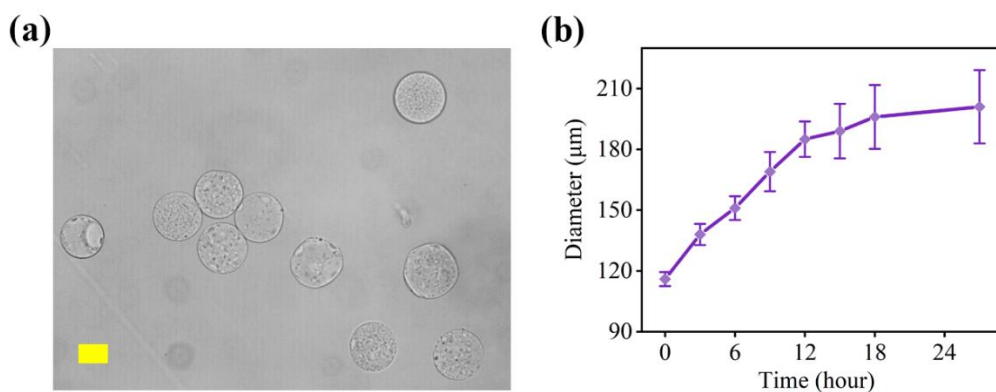

**Figure S5.** Characterization of microcarriers' swelling behavior. (a) Microcarriers with a diameter of 116  $\mu\text{m}$  exhibited a homogeneous size and swelled by 72% over a period of 27 hours. (b) Swelling curves in aqueous solution plotted as a function of time. Scale bar, 100  $\mu\text{m}$ . Error bars, mean  $\pm$  s.e.m. ( $n=3$ ).

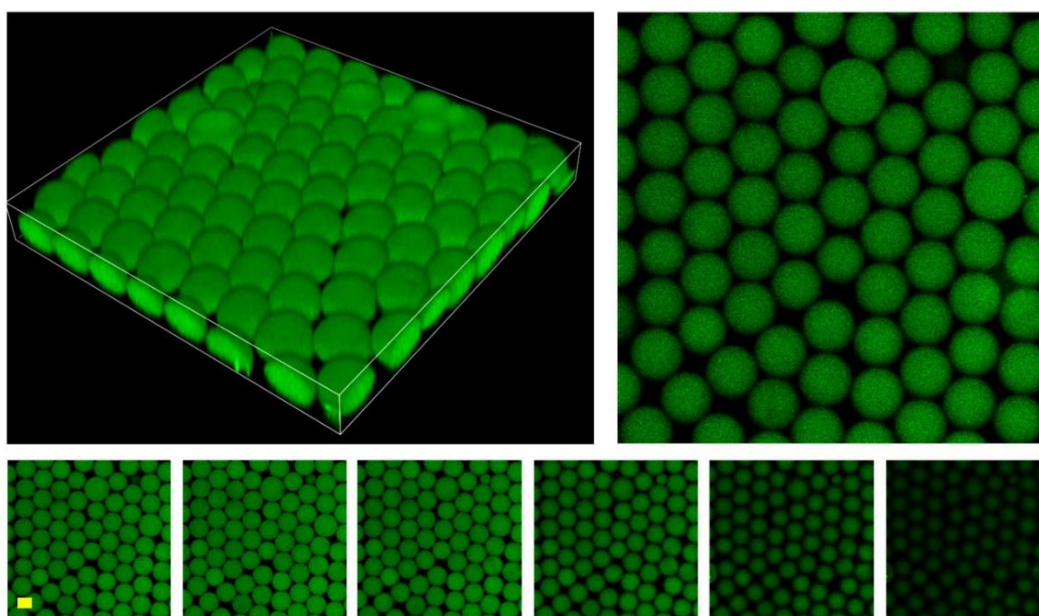

**Figure S6.** A broad field of fluorescence confocal view including a few dozens of microcarriers containing FITC-labelled nanocomposite and a series of slices acquired using the same z-scanning step. Scale bar, 100  $\mu\text{m}$ .

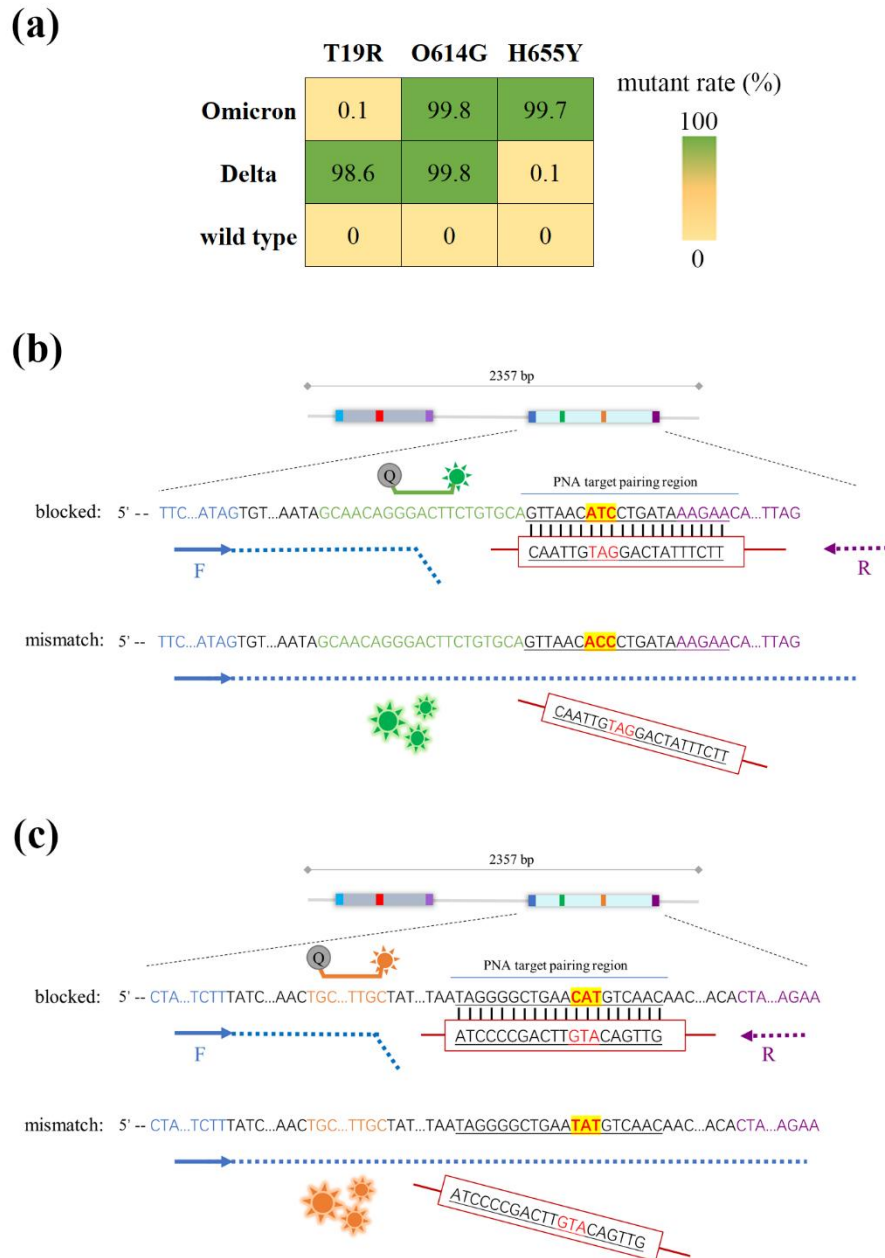

**Figure S7.** (a) Highly conserved SNP signatures used for distinguishing variants of interest based on official reported lineage comparisons. (<https://outbreak.info/>) Schematic of detecting (b) O614G and (c) H655Y mutations within SARS-CoV-2 spike protein gene. Strategy of designing PNA to selective block wild-type sequence and allow fluorescence signal only derive from targeted mutations. The sequences and positions of the targeted codons, PNA probes, primers, and TaqMan probes are indicated.

**Table S2.** Sequencing of designed PNA clamps, primers and TaqMan probes. 19-2 stands for the second design version targeting at codon 19 of the spike protein gene.

| <b>Name</b>        | <b>Sequences (starting from 5')</b> |
|--------------------|-------------------------------------|
| PNA-614            | TTCTTTATCAGGATGTAAAC                |
| PNA-19             | TTAATCTTACAACCAGAACT                |
| PNA-655            | AGTTGTTGACATGTTTCAGCC               |
| 19-forward primer  | GCCACTAGTCTCTAGTCAG                 |
| 19-reverse primer  | GGTAAGAACAAGTCCTGAG                 |
| 19-TaqMan (Cy5)    | CACACGTGGTGTATTACCCTGAC             |
| 614-forward primer | CTAACCAGGTTGCTGTTCTT                |
| 614-reverse primer | TTCTGCACCAAGTGACATAG                |
| 614-TaqMan (FAM)   | TGCACAGAAGTCCCTGTTGC                |
| 655-forward primer | CTAACCAGGTTGCTGTTCTT                |
| 655-reverse primer | TTCTGCACCAAGTGACATAG                |
| 655-TaqMan (Cy3)   | TGCACAGAAGTCCCTGTTGC                |
| PNA-19-v2          | TGTGTTAATCTTACAACCAG                |
| PNA-19-v3          | GTTCTGGTTGTAAGATTAAC                |
| PNA-19-v4          | TGAGTTCTGGTTGTAAGATT                |
| PNA-655-v2         | GTTGACATGTTTCAGCCCCTA               |
| PNA-655-v3         | CTGAACATGTCAACAACCTCA               |
| PNA-19-fv          | TTCTGGTTGTAAGATTAAC                 |
| PNA-655-fv         | TGTTGACATGTTTCAGCC                  |

\* v2 and fv represent version 2 of the other available designs and failed version, respectively.



**Table S3.** Significance analysis of different groups in Figures 5b, where “ns” represents not significant.

| fluorescent channel | mutant template % | Cy5  |     |     | FAM  |     |     | Cy3  |     |     |
|---------------------|-------------------|------|-----|-----|------|-----|-----|------|-----|-----|
|                     |                   | 0.05 | 0.5 | 1   | 0.05 | 0.5 | 1   | 0.05 | 0.5 | 1   |
| Cy5                 | 0.05              |      | *** | *** | ns   | *** | *** | ns   | *** | *** |
|                     | 0.5               |      |     | *** | ***  | ns  | *** | ***  | ns  | *** |
|                     | 1                 |      |     |     | ***  | *** | ns  | ***  | *** | ns  |
| FAM                 | 0.05              |      |     |     |      | *** | *** | ns   | *** | *** |
|                     | 0.5               |      |     |     |      |     | *** | ***  | ns  | *** |
|                     | 1                 |      |     |     |      |     |     | ***  | *** | ns  |
| Cy3                 | 0.05              |      |     |     |      |     |     |      | *** | *** |
|                     | 0.5               |      |     |     |      |     |     |      |     | *** |
|                     | 1                 |      |     |     |      |     |     |      |     |     |

**Table S4.** Back-to-back comparison with the bulk qPCR approach based on the assay priming codon 19.

| DNA template input ( $\times 10^4$ copy) | Bulk qPCR (Ct) |     | dPCR (bright drop %) |     |
|------------------------------------------|----------------|-----|----------------------|-----|
|                                          | average        | SD. | average              | SD. |
| 19.4                                     | 23.8           | 1.7 | 93.0                 | 1.7 |
| 11.6                                     | 25.5           | 1.6 | 81.7                 | 1.2 |
| 5.5                                      | 26.8           | 0.8 | 58.7                 | 3.1 |
| 0.6                                      | 30.8           | 1.2 | 12.7                 | 1.5 |
| 0 (blank)                                | 32.7           | 1.0 | 0.2                  | 0.1 |

\* DNA template inputs were deduced from bright drop percentage in dPCR assay.

\* The LoD of bulk qPCR was around  $5 \times 10^4$  copy, beyond which the Cq was indistinguishable from the blank control.

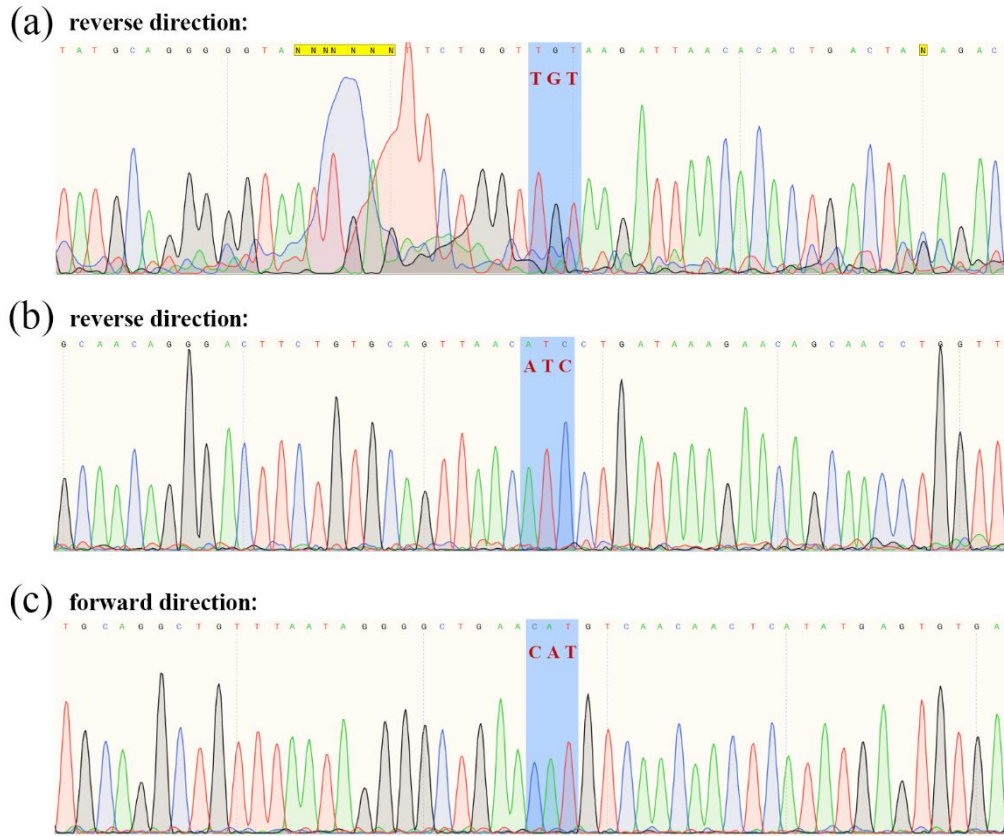

**Figure S8.** Sanger sequencing analysis of the NIR-responsive dPCR products harboring the wild type reads at codon (a) 19, (b) 614 and (c) 655.
